# Supplementary material for: Effects of Mosquito Biology on Modeled Chikungunya Virus Invasion Potential in Florida
Source: Preprints.org preprint supplement (doi:10.20944/preprints202007.0410.v1), 2020-07-19
Supplement: Supplementary file 1 [file supplementary]

# Parameter mapping between equations and Matlab code

| Descriptions                                        | Symbol         | Matlab              | Distribution <sup>a</sup> | Range      | Center |
|-----------------------------------------------------|----------------|---------------------|---------------------------|------------|--------|
| <b>State variables</b>                              |                |                     |                           |            |        |
| Susceptible Humans                                  | $H_s$          |                     |                           |            |        |
| Infectious Humans                                   | $H_{in}$       |                     |                           |            |        |
| Recovered Humans                                    | $H_r$          |                     |                           |            |        |
| Susceptible mosquitoes, species $j$                 | $S_j$          |                     |                           |            |        |
| Latent mosquitoes, species $j$                      | $L_j$          |                     |                           |            |        |
| Infectious mosquitoes, species $j$                  | $I_j$          |                     |                           |            |        |
| <b>Parameters</b>                                   |                |                     |                           |            |        |
| Mean of temperature curve                           | $T_{mean}$     | Tmean               | Uni                       | 18-27      |        |
| Day virus is introduced                             | $t_{crit}$     | Tcrit               | Uni                       | 5-360      |        |
| Human recovery rate                                 | $r_H$          | recH                | Fixed                     |            | 0.125  |
| Total (initial) number of humans                    | $H_{tot}$      | initH               | Fixed                     |            | 50000  |
| <b>Both mosquito species</b>                        |                |                     |                           |            |        |
| Interval between pulses (both species)              | $iv$           | intervalAlb,<br>aeg | Uni                       | 10-50      |        |
| Mean day peak one (from January 1)                  | $q_1$          | mean1Alb,aeg        | Fixed                     |            | 165    |
| Spread peak one                                     | $\sigma_1$     | sigma1Alb,aeg       | Fixed                     |            | 7      |
| Mean day peak two (from January 1)                  | $q_2$          | mean2Alb,aeg        | Fixed                     |            | 245    |
| Spread peak two                                     | $\sigma_2$     | sigma2Alb,aeg       | Fixed                     |            | 15     |
| Width of optimal survival range                     | $W$            | Hard coded          | Fixed                     |            | 2      |
| Central point of optimal survival temperature range | $Temp_c$       | Threshold           | Set values                | [10,16,22] |        |
| <b><i>Aedes albopictus</i></b>                      |                |                     |                           |            |        |
| Transmission mosquito to human host                 | $b_{alb}$      | bHAlb               | Tri                       | 0.1-0.7    | 0.4    |
| Transmission human host to mosquito                 | $\beta_{alb}$  | betaHAlb            | Tri                       | 0.1-0.7    | 0.4    |
| Days between blood feeding on humans                | $\alpha_{alb}$ | alphaprimeAlb       | Tri                       | 2-20       | 5      |

| Descriptions                                  | Symbol             | Matlab        | Distribution <sup>a</sup> | Range      | Center |
|-----------------------------------------------|--------------------|---------------|---------------------------|------------|--------|
| Proportion of population in peak one          | $p_{\delta 1,alb}$ | pdist1Alb     | Fixed                     |            | 0.2    |
| Proportion of population in pulses all year   | $p_{base,alb}$     | pbaseAlb      | Fixed                     |            | 0.15   |
| Minimum mortality (at $Temp_c \pm W$ )        | $\mu_{min,alb}$    | mu22Alb       | Fixed                     |            | 0.06   |
| Temperature – mortality slope                 | $\mu_{sl,alb}$     | muslAlb       | Uni                       | 0.05-0.15  |        |
| Virus development at 22.5°C                   | $\gamma_{22,alb}$  | gamma22Alb    | Fixed                     |            | 0.25   |
| Temperature – virus development slope         | $\gamma_{sl,alb}$  | gammaslAlb    | Tri                       | 0.004-0.02 | 0.015  |
| Maximum recruitment                           | $\rho_{max,alb}$   | maxrhoAlb     | Tri                       | 100-20000  | 5000   |
| Total recruitment through year                | $R_{tot,alb}$      |               | calculated                |            |        |
| <b><i>Aedes aegypti</i></b>                   |                    |               |                           |            |        |
| Transmission mosquito to human host           | $b_{aeg}$          | bHAeg         | Tri                       | 0.1-0.7    | 0.4    |
| Transmission human host to mosquito           | $\beta_{aeg}$      | betaHAeg      | Tri                       | 0.1-0.7    | 0.4    |
| Days between blood feeding on humans          | $\alpha_{aeg}$     | alphaprimeAeg | Tri                       | 1-5        | 3      |
| Proportion of population in peak one          | $p_{\delta 1,aeg}$ | pdist1Aeg     | Fixed                     |            | 0.25   |
| Proportion of population in pulses all year   | $p_{base,aeg}$     | pbaseAeg      | Fixed                     |            | 0.13   |
| Minimum mortality (at $Temp_c \pm W$ )        | $\mu_{min,aeg}$    | mu22Aeg       | Fixed                     |            | 0.1    |
| Slope of Temperature – mortality line         | $\mu_{sl,aeg}$     | muslAeg       | Uni                       | 0.05-0.15  |        |
| Virus development at 22.5°C Virus development | $\gamma_{22,aeg}$  | gamma22Aeg    | Fixed                     |            | 0.25   |
| Temperature – virus development slope         | $\gamma_{sl,aeg}$  | gammaslAeg    | Tri                       | 0.004-0.02 | 0.015  |
| Maximum recruitment                           | $\rho_{max,aeg}$   | maxrhoAeg     | Tri                       | 100-20000  | 5000   |
| Total recruitment through year                | $R_{tot,aeg}$      |               | calculated                |            |        |

---

```

function CHIKV2sim(numruns)
%Usage: CHIKV2sim(numruns)
%This is the top level script for iterative CHIKV2 simulations.
%numruns = the number of simulations to run.
%CHIKV2runmodel.m is called iteratively with its runnum input
    parameter
%set from 1 to numruns.
%Simulation progress is logged to CHIKV2simlog.txt.
%Simulation solutions are saved as matlab formatted files.
close all;          %close any open figures
if nargin < 1, numruns = 250; end %default numruns value
scrsz = get(0,'ScreenSize');
logfid = fopen('CHIKV2simlog.txt','wt');

fprintf(logfid,'Start simulations: %s\n', datestr(now));

%initialize results array
maxHi = NaN(numruns,2); %Maximum human infection and location

for runnum = 1:numruns
    tic;
    CHIKV2sol = CHIKV2runmodel(runnum);
    fprintf(logfid,...
        'Run%3u simulation complete in %g seconds\n',runnum, toc);
    spoints = linspace(0,730,7301);

    [sy,syp] = deval(CHIKV2sol,spoints);
    spt = spoints'; %transposed to meet column limits
    syt = sy'; %when written to text or excel files
    sypt = syp';

    textarray = [spt syt sypt]; %build a text array for output

    [maxHi(runnum,1),maxHi(runnum,2)] = max(syt(:,2));
    namestring = ['Run' num2str(runnum)];
    close all; %close any open figures

    %save solution
    save(namestring,'CHIKV2sol','spt','syt','sypt');

end
save('maxHi','maxHi'); %save maximum human infection array
fprintf(logfid,'End simulations: %s\n', datestr(now));
fclose('all');

figure
hist(maxHi(:,1),20)
xlabel('Maximum Human Infection');
ylabel('Count');
title('Maximum Human Infection Histogram');
print ('-dmeta', '-r1200','MaxHihist');
saveas(gcf, 'MaxHihist', 'fig');

```

---

---

```
end %CHIKV2sim
```

*Error using load*

*'../weatherdata/FloridaNormals.mat' is not found in the current folder or on the MATLAB path, but exists in:*

*C:\Users\clord\Documents\MATLAB\CHIKV7\CHIKV7paramgen*

*Change the MATLAB current folder or add its folder to the MATLAB path.*

*Error in CHIKV2runmodel (line 134)*

*load('../weatherdata/FloridaNormals.mat',...*

*Error in CHIKV2sim\_annotate (line 21)*

*CHIKV2sol = CHIKV2runmodel(runnum);*

*Published with MATLAB® R2019b*

---

```

function [sol,tcrit] = CHIKV2runmodel(runnum)

%
%This is the Chikungunya virus (CHIKV2) model.
%Variants of the model have threshold (Temp_c) parameters hard coded
%in parameter list below, at 10, 16 or 22.

%model code published with Matlab 2019b.  Programmed and simulations
run
% with Matlab versions 2015-2018.

if nargin < 1, runnum = 250; end %default runnum value
%runnum = 34;           %to run single parameter sets

daylim = 730;           %simulation end day

%load simulation parameters from file
%see table at start to map parameter names here to equations
load(' ../../CHIKV2paramgen/CHIKV2params.mat','params')

%assign params to named variables
Tmean = params(runnum,1); %mean of temperature curve
%human host
recH = params(runnum,2); %recovery rate
initH = params(runnum,3); %initial number of humans
mH = params(runnum,4); %mortality
baseH = params(runnum,5); %recruitment
tcrit = params(runnum,6); %day virus is introduced
%Mosquito Population Aedes albopictus (Alb)
bHAlb = params(runnum,7); %transmission to human host
betaHAlb = params(runnum,8);
alphaprimeAlb = params(runnum,9); %days between meals
intervalAlb = params(runnum,10); %interval between pulses
pdist1Alb = params(runnum,11); %proportion of population in peak one
pbaseAlb = params(runnum,12); %proportion of population in pulses all
year
mean1Alb = params(runnum,13); %mean day peak one(from January 1)
sigma1Alb = params(runnum,14); %spread peak one
mean2Alb = params(runnum,15); %mean day peak two(from January 1)
sigma2Alb = params(runnum,16); %spread peak two
mu22Alb = params(runnum,17); %mortality at temp=muthresh, also
minimum mortality
muslAlb = params(runnum,18); %slope of Temp-mortality
gamma22Alb = params(runnum,19); %virus devel at 22.5
gammaaslAlb = params(runnum,20); %slope of virus devel
maxrhoAlb = params(runnum,21); %total Alb recruitment through year
%Mosquito Population Aedes aegypti (Aeg)
bHAeg = params(runnum,22); %transmission to human host
betaHAeg = params(runnum,23);
alphaprimeAeg = params(runnum,24); %days between meals

```

---

---

```

intervalAeg = params(runnum,25); %interval between pulses
pdist1Aeg = params(runnum,26); %proportion of population in peak one
pbaseAeg = params(runnum,27); %proportion of population in pulses all
year
mean1Aeg = params(runnum,28); %mean day peak one(from January 1)
sigma1Aeg = params(runnum,29); %spread peak one
mean2Aeg = params(runnum,30); %mean day peak two(from January 1)
sigma2Aeg = params(runnum,31); %spread peak two
mu22Aeg = params(runnum,32); %vector mortality
mus1Aeg = params(runnum,33); %slope of Temp-mortality
gamma22Aeg = params(runnum,34); %virus development
gammaas1Aeg = params(runnum,35); %slope of virus devel
maxrhoAeg = params(runnum,36); %total Aeg recruitment through year

%fixed parameters
meanH = 99; %time of peak recruitment
%days from January 1 start of simulation
sigmaH = 99; %spread around meanH
incrH = 0;
pHmeanAlb = 1; %mean of human bias function
pHamp1Alb = 0; %amplitude of human bias function
offsetAlb = 0; %offset for human bias
pHmeanAeg = 1; %mean of human bias function
pHamp1Aeg = 0; %amplitude of human bias function
offsetAeg = 0; %offset for human bias
muthreshAlb = 10; %temp threshold (+2-2) for minimum mortality
gammathreshAlb = 10; %lower temp threshold for virus development
muthreshAeg = 10; %temp threshold (+2-2) for minimum mortality
gammathreshAeg = 10; %lower temp threshold for virus development

%derived parameter calculations
peakH = incrH * initH;
numH = initH + peakH;
totalAlb = maxrhoAlb * numH;
totalAeg = maxrhoAeg * numH;
NoOfPulseAlb = 365/intervalAlb; %per year basis
pulseAlb = round((pbaseAlb * totalAlb)/(NoOfPulseAlb+1));
periodAlb = 2*pi/intervalAlb;
testtAlb = (intervalAlb-0.5)+(intervalAlb/2);
thresholdAlb = -cos(periodAlb*testtAlb);
NoOfPulseAeg = 365/intervalAeg; %per year basis
pulseAeg = round((pbaseAeg * totalAeg)/(NoOfPulseAeg+1));
periodAeg = 2*pi/intervalAeg;
testtAeg = (intervalAeg-0.5)+(intervalAeg/2);
thresholdAeg = -cos(periodAeg*testtAeg);

%load temperature data from file
load('./../weatherdata/FloridaNormals.mat',...
'FloridaMaxAvg','FloridaMinAvg','FloridaMaxRange','FloridaMinRange')

%function to convert Fahrenheit to Celsius
F2C = @(x)(x - 32) * 5/9;

```

---

---

```

%convert the florida normals temperature data to Celsius
hmean = F2C(FloridaMaxAvg); %converts a temperature
lmean = F2C(FloridaMinAvg);
hrange = FloridaMaxRange * 5/9; %converts a temperature range
lrange = FloridaMinRange * 5/9;

%calculate the temperature range from the Tmean parameter
Trange = lrange + (hrange-lrange)*(hmean-Tmean)/(hmean-lmean);

%y0 is a column vector for the initial values of the 15 state
variables
%human host
y0 = [initH %suseptible
      0 %infected
      0 %recovered
      %Mosquito Population Alb
      pulseAlb %suseptible
      0 %latent
      0 %infectious
      %Mosquito Population Aeg
      pulseAeg %suseptible
      0 %latent
      0 %infectious

      0 %Alb recruitment accum, for output
      0 %Aeg recruitment accum, for output
      0 %human recruitment accumulator, for output
      0 %infected H accum, for output
      0 %infected Alb accum, for output
      0]; %infected Aeg accum, for output

%ode45 built-in defaults: 'RelTol',1e-3,'AbsTol',1e-6

options = odeset('MaxStep',1,'RelTol',1e-6,'Events',@P2events,...
    'NonNegative',[],'Refine',1);

sol = ode45(@gradient,[0 daylim],y0,options);

%The solution is expected to terminate at tcrit (prior to 365).
%It is then re-started with one infected human.
% ynew is a column vector for the 15 new initial state variables
ynew = sol.y(:,end); %the last value of the 15 states
ynew(2) = 1; %one infected in Hi

%RelTol reduced to 1e-9 or smaller for best results
options = odeset('MaxStep',1,'RelTol',1e-9,'Events',@P2events,...
    'NonNegative',[],'Refine',1);

solnew = ode45(@gradient,[sol.x(end) daylim],ynew,options);
sol.x = [sol.x solnew.x(2:end)]; %skip first point (same as last
point)
sol.y = [sol.y solnew.y(:,2:end)];
sol.xe = [sol.xe solnew.xe];
sol.ye = [sol.ye solnew.ye];

```

---

---

```

sol.ie = [sol.ie solnew.ie];
sol.stats.nsteps = sol.stats.nsteps + solnew.stats.nsteps;
sol.stats.nfailed = sol.stats.nfailed + solnew.stats.nfailed;
sol.stats.nfevals = sol.stats.nfevals + solnew.stats.nfevals;
sol.idata.f3d = cat(3,sol.idata.f3d,solnew.idata.f3d(:, :, 2:end));

%The solution may terminate if the virus does not persist.
%The infected classes are checked for values less than 0.5. If this
    event
%is detected, the simulation is terminated and restarted with the
    infected
%classes set to zero values.
while sol.x(end) < daylim
    %at this point, there has been a terminal event and we are not
    finished
    % ynew is a column vector for the 15 new initial state variables
        ynew = sol.y(:,end);           %the last value of the 15 states
    ynew(2) = 0;      %zero Hi
    ynew(5) = 0;      %zero LAlb
    ynew(6) = 0;      %zero YAlb
    ynew(8) = 0;      %zero LAeg
    ynew(9) = 0;      %zero YAeg

    solnew = ode45(@gradient,[sol.x(end) daylim],ynew,options);
    sol.x = [sol.x solnew.x(2:end)]; %skip first point (same as last
    point)
    sol.y = [sol.y solnew.y(:,2:end)];
    sol.xe = [sol.xe solnew.xe];
    sol.ye = [sol.ye solnew.ye];
    sol.ie = [sol.ie solnew.ie];
    sol.stats.nsteps = sol.stats.nsteps + solnew.stats.nsteps;
    sol.stats.nfailed = sol.stats.nfailed + solnew.stats.nfailed;
    sol.stats.nfevals = sol.stats.nfevals + solnew.stats.nfevals;
    sol.idata.f3d = cat(3,sol.idata.f3d,solnew.idata.f3d(:, :, 2:end));
end %while
%toc

%-----
%Nested functions - allows base variables to be visible within
    functions
%
function dydt = gradient(time,state)
%assign some state variables to named variables for convenience
%human host
    Hs = state(1);    %suseptible
    Hi = state(2);    %infected
    Hr = state(3);    %recovered
%Mosquito Population Alb
    SusAlb = state(4); %suseptible
    LAlb = state(5);  %latent
    YAlb = state(6);  %infectious
%Mosquito Population Aeg
    SusAeg = state(7); %suseptible

```

---

---

```

    LAeg    = state(8);    %latent
    YAeg    = state(9);    %infectious

allH = Hs+Hi+Hr;

%temperature model
%
%time is adjusted by -26.5 days to align the temperature model
maximum
%to the predominant maximum from the temperature data
%(day 209, based on median(FloridaMaxsIdx) = 209)
%2*pi/365 converts adjusted time in days to radians, 0 to 2*pi
%The 0-1 day for simulation is January 1.
%maximum summer temperature (when -cos((time-26.5)*2*pi/365) = 1),
%is when (time-26.5)*2*pi/365 = pi; time = 209
Temp = (Trange/2)*(-cos((time-26.5)*2*pi/365)) + Tmean;

%define some functions of temperature
%minimum mu = mu22, maximum mu = 1
    if Temp < muthreshAlb
        muAlb = min(1, max(mu22Alb, -muslAlb * (Temp - muthreshAlb + 2)
+ mu22Alb));
    else
        muAlb = min(1, max(mu22Alb, muslAlb * (Temp - muthreshAlb - 2)
+ mu22Alb));
    end
    if Temp < muthreshAeg
        muAeg = min(1, max(mu22Aeg, -muslAeg * (Temp - muthreshAeg + 2)
+ mu22Aeg));
    else
        muAeg = min(1, max(mu22Aeg, muslAeg * (Temp - muthreshAeg - 2)
+ mu22Aeg));
    end
%gamma = gammasl * (Temp -22.5) + gamma22;
if Temp < gammathreshAlb
    gammaAlb = 0;
else
    gammaAlb = max(0, gammaslAlb*(Temp-22.5) + gamma22Alb); %protect from
neg
end
if Temp < gammathreshAeg
    gammaAeg = 0;
else
    gammaAeg = max(0, gammaslAeg*(Temp-22.5) + gamma22Aeg); %protect from
neg
end

%susceptible vectorAlb,Aeg recruitment
% diff1Alb= mean1Alb-time;
% diff2Alb= mean2Alb-time;
diff1Alb= min([abs(mean1Alb-time),abs(mean1Alb+365-time),...
abs(mean1Alb-365-time),abs(mean1Alb+730-time)]);
diff2Alb= min([abs(mean2Alb-time),abs(mean2Alb+365-time),...
abs(mean2Alb-365-time),abs(mean2Alb+730-time)]);

```

---

---

```

temp1Alb= sigma1Alb*sqrt(2*pi);
temp2Alb= sigma2Alb*sqrt(2*pi);
dist1Alb= (1/(temp1Alb)) * exp(-(diff1Alb^2)/(2*(sigma1Alb^2)));
dist2Alb= (1/(temp2Alb)) * exp(-(diff2Alb^2)/(2*(sigma2Alb^2)));
pdist2Alb= 1- (pbaseAlb + pdist1Alb);
% diff1Aeg= mean1Aeg-time;
% diff2Aeg= mean2Aeg-time;
diff1Aeg= min([abs(mean1Aeg-time),abs(mean1Aeg+365-time),...
abs(mean1Aeg-365-time),abs(mean1Aeg+730-time)]);
diff2Aeg= min([abs(mean2Aeg-time),abs(mean2Aeg+365-time),...
abs(mean2Aeg-365-time),abs(mean2Aeg+730-time)]);
temp1Aeg= sigma1Aeg*sqrt(2*pi);
temp2Aeg= sigma2Aeg*sqrt(2*pi);
dist1Aeg= (1/(temp1Aeg)) * exp(-(diff1Aeg^2)/(2*(sigma1Aeg^2)));
dist2Aeg= (1/(temp2Aeg)) * exp(-(diff2Aeg^2)/(2*(sigma2Aeg^2)));
pdist2Aeg= 1- (pbaseAeg + pdist1Aeg);

%This treatment seems sufficient, ode45 handles the discontinuities OK.
testrhoAlb = pdist1Alb*totalAlb*dist1Alb +
pdist2Alb*totalAlb*dist2Alb;
periodAlb = (2*pi) /intervalAlb;
testrhoAeg = pdist1Aeg*totalAeg*dist1Aeg +
pdist2Aeg*totalAeg*dist2Aeg;
periodAeg = (2*pi) /intervalAeg;
test_value = [testrhoAlb-1
thresholdAlb+cos(periodAlb*(time+(intervalAlb/2)))
testrhoAeg-1
thresholdAeg+cos(periodAeg*(time+(intervalAeg/2)))];

% Mosquito Population Alb
if (test_value(1) >= 0) %distributed recruit >1
    if (test_value(2) < 0) %and time for pulse
        rhoAlb = pulseAlb + testrhoAlb;
    else %and not time for pulse
        rhoAlb = testrhoAlb;
    end
else %distributed recruit <1
    if (test_value(2) < 0) %and time for pulse
        rhoAlb = pulseAlb;
    else %and not time for pulse
        rhoAlb = 0;
    end
end

% Mosquito Population Aeg
if (test_value(3) >= 0) %distributed recruit >1
    if (test_value(4) < 0) %and time for pulse
        rhoAeg = pulseAeg + testrhoAeg;
    else %and not time for pulse
        rhoAeg = testrhoAeg;
    end
else %distributed recruit <1
    if (test_value(4) < 0) %and time for pulse
        rhoAeg = pulseAeg;
    else %and not time for pulse

```

---

---

```

        rhoAeg = 0;
    end
end

%human recruitment (disabled by fixed parameter choices)
temp3= peakH/(sigmaH*sqrt(2*pi));
% diff3= meanH-time;
diff3= min([abs(meanH-time),abs(meanH+365-time),abs(meanH+730-
time)]);
RecruitH = baseH + temp3*exp(-(diff3^2)/(2*(sigmaH^2)));

%biased biting rates (kept for future use, here disabled by fixed
parameter choices)
%cos goes from -1 to +1, check the amplitude range of result
% Mosquito Population Alb
pHALb = pHmeanAlb + pHamplAlb*cos((time-offsetAlb)*2*pi/365); %prop
feeding on humans
alphaAlb = alphaprimeAlb/pHALb; %days/meal on
humans
aHALb = 1/alphaAlb;
% Mosquito Population Aeg
pHAeg = pHmeanAeg + pHamplAeg*cos((time-offsetAeg)*2*pi/365); %prop
feeding on humans
alphaAeg = alphaprimeAeg/pHAeg; %days/meal on
humans
aHAeg = 1/alphaAeg;

%EQUATIONS
%calculate terms for the derivative equations
dHs2i = ((aHALb*bHALb)/allH)*Hs*YAlb + ((aHAeg*bHAeg)/allH)*Hs*YAeg;
dHs = RecruitH - (mH*Hs) - dHs2i;
dHi = dHs2i - (recH*Hi) - mH*Hi;
dHr = recH*Hi - mH*Hr;
%{
Currently mH=RecruitH=0; params kept as placeholders for later use
%}

dSusAlb = rhoAlb-(muAlb*SusAlb)-(aHALb*betaHALb*(Hi/allH))*SusAlb;
dLAlb = (aHALb*betaHALb*(Hi/allH))*SusAlb -muAlb*LAlb-gammaAlb*LAlb;
dYAlb = gammaAlb*LAlb-muAlb*YAlb;

dSusAeg = rhoAeg-(muAeg*SusAeg)-(aHAeg*betaHAeg*(Hi/allH))*SusAeg;
dLAeg = (aHAeg*betaHAeg*(Hi/allH))*SusAeg -muAeg*LAeg-gammaAeg*LAeg;
dYAeg = gammaAeg*LAeg-muAeg*YAeg;

%dydt is a column vector for the "gradient" of the 19 state
variables
%human host
dydt = [dHs % [1]susceptible
        dHi % [2]infected
        dHr % [3]recovered
        %vector Alb
        dSusAlb % [4]susceptible
        dLAlb % [5]latent

```

---

---

```

        dYAlb      %[6]infectious
%vector Aeg
        dSusAeg    %[7]susceptible
        dLAeg      %[8]latent
        dYAeg      %[9]infectious
        rhoAlb     %[10]vector Alb recruitment accum
        rhoAeg     %[11]vector Aeg recruitment accum
        RecruitH   %[12]human recruitment accum
        dHs2i      %[13]infectious H accum
        gammaAlb*LAlb  %[14]infectious Alb accum
        gammaAeg*LAeg];  %[15]infectious Aeg accum
end %gradient

%This format for the events function is required by the ode45
function.
function [value,isterminal,direction] = P2events(time,y)
    Hitest  = y(2) < 0.5;
    LAlbtest = y(5) < 0.5;
    LAegtest = y(8) < 0.5;
    YAlbtest = y(6) < 0.5;
    YAegtest = y(9) < 0.5;
    alltest = Hitest&LAlbtest&LAegtest&YAlbtest&YAegtest;

    value = [time-tcrit
            alltest-0.5];
    if time <= tcrit
        isterminal = [1; 0];
    else
        isterminal = [1; 1];
    end %if
    direction = [1; 1];
end

end

```

*Error using load*

*'./../weatherdata/FloridaNormals.mat' is not found in the current folder or on the MATLAB path, but exists in:*

*C:\Users\clord\Documents\MATLAB\CHIKV7\CHIKV7paramgen*

*Change the MATLAB current folder or add its folder to the MATLAB path.*

*Error in CHIKV2runmodel\_annotatecomments (line 97)*

*load('./../weatherdata/FloridaNormals.mat',...*

*Published with MATLAB® R2019b*
