# Supplementary material for: Effects of Mosquito Biology on Modeled Chikungunya Virus Invasion Potential in Florida
Source: Preprints.org preprint supplement (doi:10.20944/preprints202007.0410.v1), 2020-07-19
Supplement: Supplementary file 2 [file supplementary]

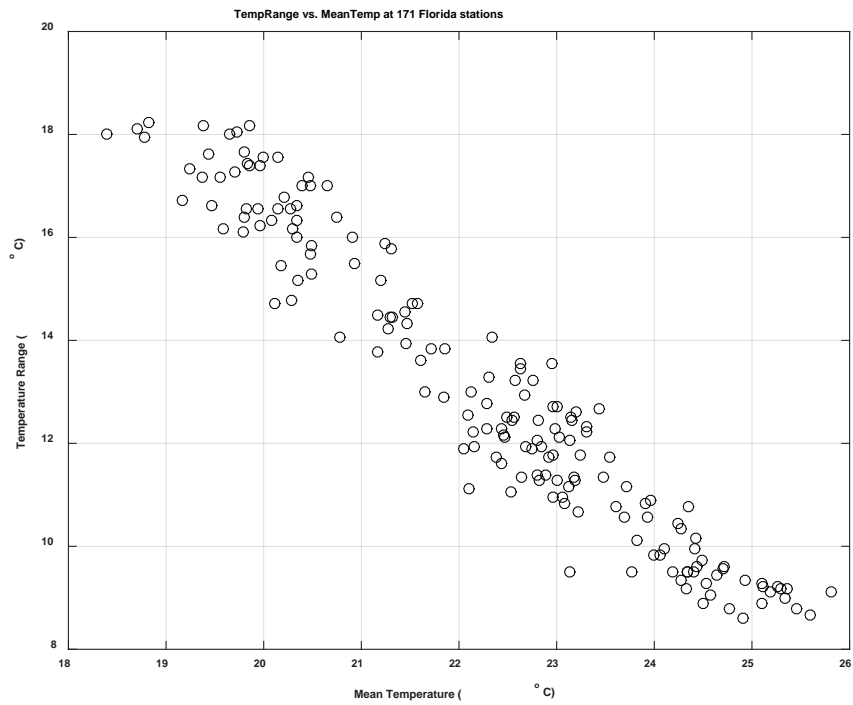

Figure S1. Relationship between mean and range of yearly temperatures for Florida weather stations.

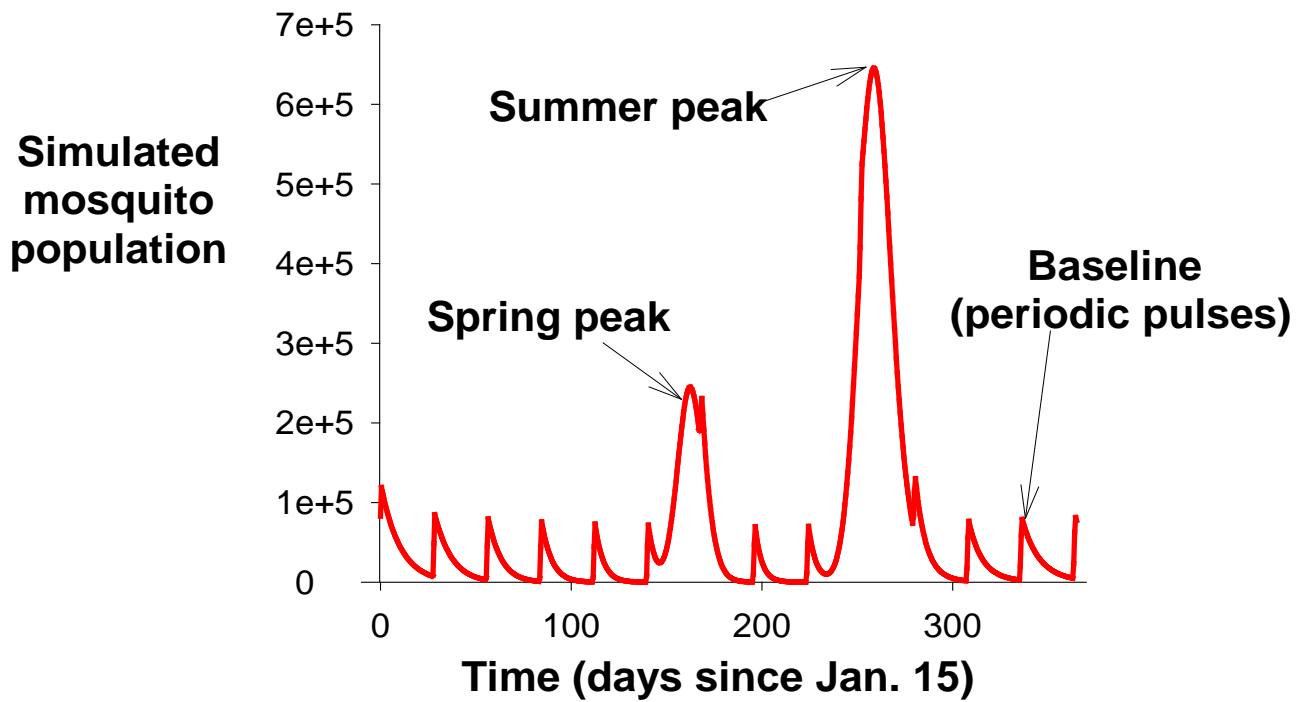

Figure S2. Phases of modeled mosquito populations

A

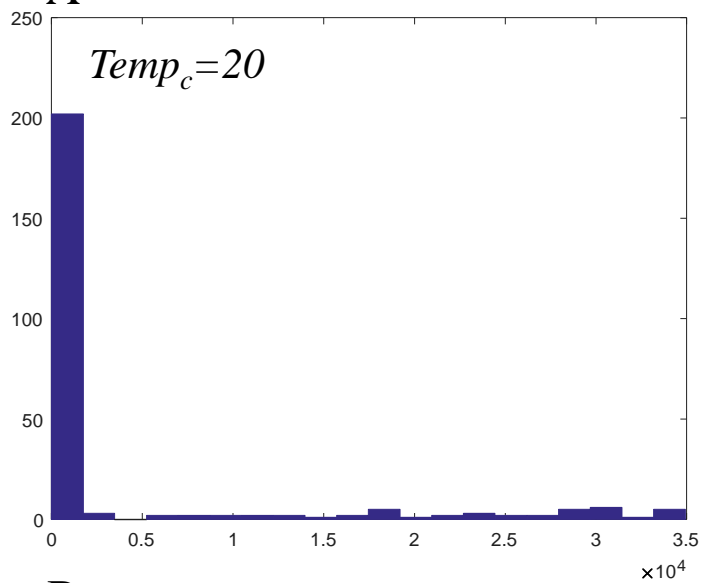

Figure S3.  $MaxH_i$  histograms for each  $Temp_c$ . Note change in y-axis.

B

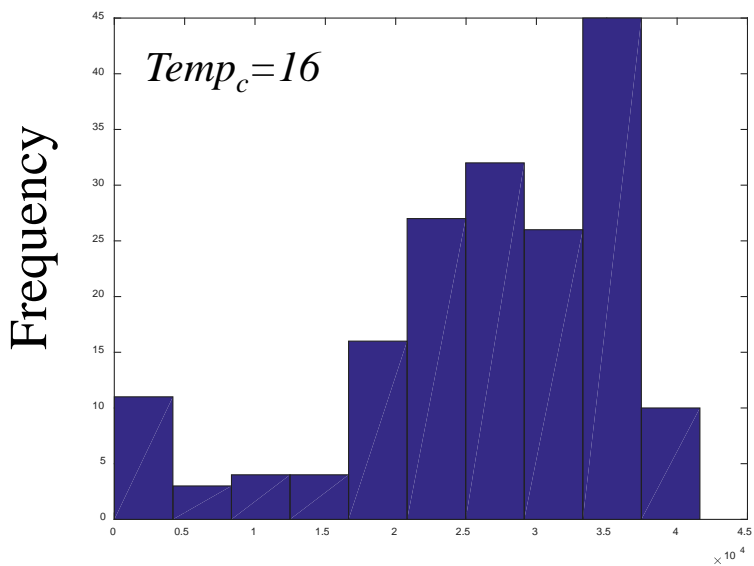

C

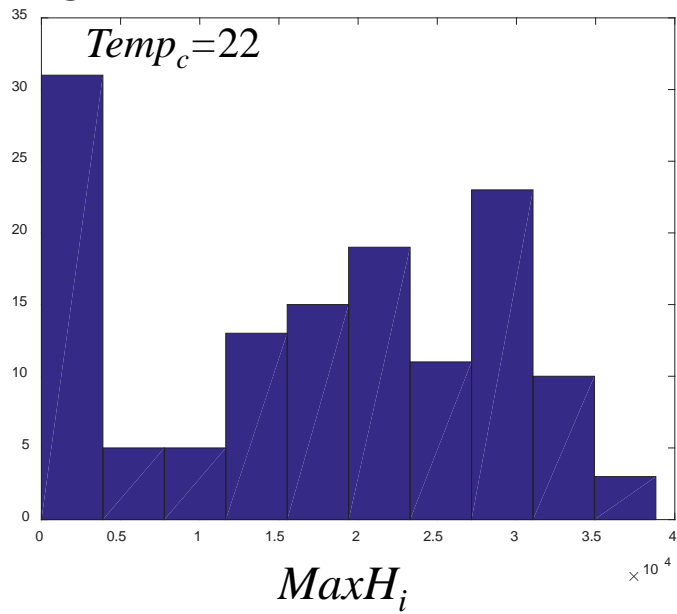

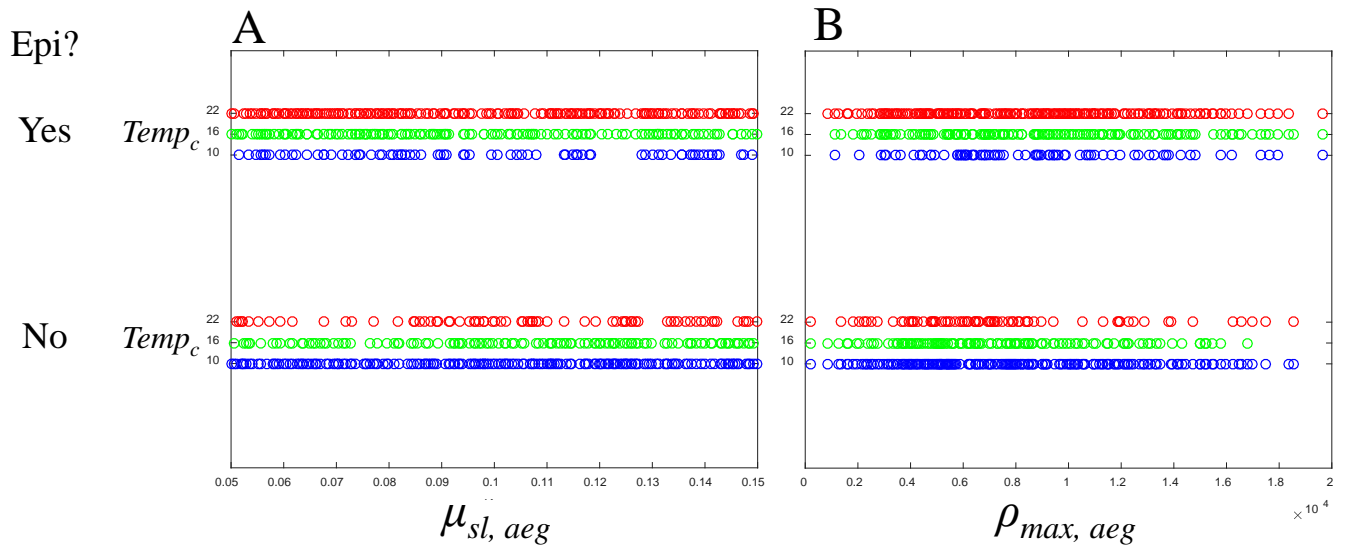

Figure S4. Relationship between epidemic occurrence and A) mortality – temperature slope, B) maximum mosquito population, for *Ae. aegypti*. All 3 values of  $Temp_c$  shown (22°C, red; 16°C, green; 10°C, blue). Top set, epidemic occurred; bottom, no epidemic. Each point is one simulation plotted for parameter from that run set. All other parameters varied as well, in the LHC sampling scheme. Epidemics were more likely at  $Temp_c = 22^\circ\text{C}$ , with lower values of  $\mu_{sl, aeg}$  and higher values of  $\rho_{max, aeg}$  at  $Temp_c = 16^\circ\text{C}$  and  $22^\circ\text{C}$ .
